# Supplementary material for: The potential impact of sleep-related movement disorders on stroke risk: a population-based longitudinal study
Source: PubMed Central journal article supplement — QJM. 2017 May 8;110(10):649–55. doi: 10.1093/qjmed/hcx097 (PMC5914305; doi:10.1093/qjmed/hcx097), 2017-05-08
Supplement: supplementarytab1_2_3_hcx097.pdf [file supplementarytab1_2_3_hcx097.pdf]

**TableS1:** Baseline demographic status and comorbidity compared between SRMD and comparison groups among aged <45

| Variable       | SRMD cohort<br>N = 216 (%) | Comparison cohort<br>N = 864 (%) | <i>p</i> -value |
|----------------|----------------------------|----------------------------------|-----------------|
| Sex            |                            |                                  | 0.999           |
| Female         | 106 (49.07)                | 424 (49.07)                      |                 |
| Male           | 110 (50.93)                | 440 (50.63)                      |                 |
| Comorbidity    |                            |                                  |                 |
| Hypertension   | 12 (5.56)                  | 49 (5.67)                        | 0.947           |
| DM             | 10 (4.63)                  | 40 (4.63)                        | 0.999           |
| IHD            | 5 (2.31)                   | 19 (2.20)                        | 0.918           |
| Hyperlipidemia | 8 (3.70)                   | 34 (3.94)                        | 0.875           |
| AF             | 0 (0)                      | 0 (0)                            | -               |
| OSA            | 2 (0.93)                   | 10 (1.16)                        | 0.772           |

Abbreviation: SRMD: sleep-related movement disorders; DM: diabetes mellitus; IHD: ischemic heart disease; AF: atrial fibrillation; OSA: obstructive sleep apnea

**TableS2:** Baseline demographic status and comorbidity among PLMD and RLS groups of patients aged <45

| Variable       | PLMD<br>N = 172 (%) | RLS<br>N = 44 (%) | p-value |
|----------------|---------------------|-------------------|---------|
| Sex            |                     |                   | 0.616   |
| Female         | 86 (50.00)          | 20 (45.45)        |         |
| Male           | 86 (50.00)          | 24 (54.55)        |         |
| Comorbidity    |                     |                   |         |
| Hypertension   | 9 (5.23)            | 3 (6.82)          | 0.917   |
| DM             | 8 (4.65)            | 2 (4.55)          | 0.995   |
| IHD            | 4 (2.33)            | 1 (2.27)          | 0.997   |
| Hyperlipidemia | 6 (3.49)            | 2 (4.55)          | 0.946   |
| AF             | 0 (0)               | 0 (0)             | -       |
| OSA            | 2 (1.16)            | 0 (0)             | <0.001  |

Abbreviation: PLMD: periodic limb movement disorder; RLS: restless legs syndrome; DM: diabetes mellitus; IHD: ischemic heart disease; AF: atrial fibrillation; OSA: obstructive sleep apnea

**TableS3:** Incidence of stroke and stroke subtype and multivariate Cox proportional hazards regression analysis measured hazard ratio for study cohort among aged <45 by various time intervals

| Variable                    | SRMD cohort |     |          | Comparison cohort |       |        | Crude HR (95% CI)               | Adjusted HR (95% CI)            |
|-----------------------------|-------------|-----|----------|-------------------|-------|--------|---------------------------------|---------------------------------|
|                             | Event       | PYs | Rate     | Event             | PYs   | Rate   |                                 |                                 |
| <b>Follow &lt;1 yr</b>      |             |     |          |                   |       |        |                                 |                                 |
| All stroke                  | 10          | 70  | 1,428.57 | 3                 | 82    | 365.85 | 3.90 (3.07-4.74) <sup>***</sup> | 3.04 (2.25-4.50) <sup>***</sup> |
| Hemorrhagic stroke          | 2           | 70  | 285.71   | 1                 | 82    | 121.95 | 2.34 (1.95-2.74) <sup>**</sup>  | 2.01 (1.07-3.22) <sup>*</sup>   |
| Ischemic stroke             | 8           | 70  | 1,142.86 | 2                 | 82    | 243.90 | 4.69 (3.94-5.01) <sup>**</sup>  | 3.26 (2.11-4.86) <sup>**</sup>  |
| <b>Follow ≥1, &lt;2 yrs</b> |             |     |          |                   |       |        |                                 |                                 |
| All stroke                  | 6           | 88  | 681.82   | 2                 | 106   | 188.68 | 3.61 (3.04-4.19) <sup>**</sup>  | 2.89 (2.07-3.68) <sup>**</sup>  |
| Hemorrhagic stroke          | 3           | 88  | 340.91   | 1                 | 106   | 94.34  | 3.61 (3.20-4.02) <sup>**</sup>  | 2.89 (2.14-3.08) <sup>**</sup>  |
| Ischemic stroke             | 3           | 88  | 340.91   | 1                 | 106   | 94.34  | 3.61 (3.20-4.02) <sup>**</sup>  | 2.89 (2.14-3.08) <sup>**</sup>  |
| <b>Follow ≥2 yrs</b>        |             |     |          |                   |       |        |                                 |                                 |
| All stroke                  | 5           | 772 | 64.77    | 4                 | 3,491 | 11.46  | 5.65 (5.48-5.82) <sup>***</sup> | 4.79 (3.14-5.51) <sup>***</sup> |
| Hemorrhagic stroke          | 2           | 772 | 25.91    | 1                 | 3,491 | 2.86   | 9.04 (8.94-9.15) <sup>**</sup>  | 6.31 (4.56-8.89) <sup>**</sup>  |
| Ischemic stroke             | 3           | 772 | 38.86    | 3                 | 3,491 | 8.59   | 4.52 (4.39-4.66) <sup>**</sup>  | 3.28 (2.10-4.35) <sup>**</sup>  |

Model adjusted for age, sex, hypertension, DM, IHD, hyperlipidemia, AF, OSA

Abbreviation: PYs: person-years; Rate: incidence rate, per 1,000 person-years; SRMD: sleep-related movement disorders; DM: diabetes mellitus; IHD: ischemic heart disease; AF: atrial fibrillation; OSA: obstructive sleep apnea

\* $p < 0.05$ ; \*\* $p < 0.01$ ; \*\*\* $p < 0.001$
